# Supplementary material for: Contemporary and historical oceanographic processes explain genetic connectivity in a Southwestern Atlantic coral
Source: PubMed Central journal article supplement (PMC5805724; doi:10.1038/s41598-018-21010-y), 2018-02-08

## Supplementary material

### Contemporary and historical oceanographic processes explain genetic connectivity in Southwestern Atlantic corals

L. Peluso, V. Tascheri, F. Nunes, C. B. Castro, D. O. Pires, C. Zilberberg

#### Table of contents

|           |        |
|-----------|--------|
| Table S1  | Page 2 |
| Table S2  | Page 2 |
| Table S3  | Page 3 |
| Table S4  | Page 4 |
| Table S5  | Page 5 |
| Figure S1 | Page 6 |
| Figure S2 | Page 7 |
| Figure S3 | Page 7 |

Table S1: Allelic richness per locus per sampling site. Calculations were based on 10 diploid individuals. PML was excluded due to low sample size (analysis would be based only in 4 diploid individuals).

|       | FZ     | AR     | FN     | JP     | TE     | SA     | PS    | AB     | GP    | TR     | BZ    | AC    | IG    | IB    |
|-------|--------|--------|--------|--------|--------|--------|-------|--------|-------|--------|-------|-------|-------|-------|
| Mhi1  | 9.238  | 9.504  | 8.635  | 8.022  | 6.270  | 6.007  | 6.113 | 7.636  | 5.643 | 9.924  | 4.944 | 5.854 | 1.886 | 1.761 |
| Mhi2  | 8.470  | 9.929  | 10.602 | 12.009 | 8.655  | 9.427  | 9.787 | 9.915  | 9.000 | 10.134 | 7.457 | 8.711 | 4.827 | 4.598 |
| Mhi14 | 7.818  | 5.555  | 6.162  | 5.000  | 6.419  | 6.556  | 5.951 | 5.275  | 4.812 | 7.442  | 4.618 | 3.909 | 2.999 | 4.078 |
| Mhi16 | 1.575  | 2.430  | 2.773  | 4.456  | 2.426  | 5.116  | 2.124 | 3.042  | 1.996 | 1.978  | 1.867 | 1.945 | 3.807 | 2.635 |
| Mhi17 | 3.479  | 2.000  | 2.499  | 1.986  | 3.564  | 4.299  | 3.215 | 3.276  | 3.810 | 3.225  | 1.000 | 1.000 | 1.993 | 1.985 |
| Mhi18 | 7.675  | 9.243  | 8.982  | 7.603  | 9.676  | 7.938  | 8.655 | 7.363  | 9.933 | 10.358 | 8.173 | 6.773 | 6.200 | 5.106 |
| Mhi20 | 10.961 | 6.300  | 6.286  | 9.936  | 10.152 | 11.727 | 8.830 | 10.138 | 9.411 | 9.683  | 6.882 | 7.855 | 2.602 | 4.385 |
| Mhi21 | 8.116  | 10.706 | 10.914 | 8.053  | 9.076  | 6.004  | 7.452 | 7.154  | 7.889 | 7.984  | 5.536 | 4.916 | 3.525 | 3.905 |
| Mhi23 | 6.097  | 7.015  | 7.422  | 6.341  | 8.414  | 9.960  | 9.463 | 11.397 | 3.976 | 7.263  | 4.219 | 4.511 | 2.706 | 3.160 |
| Mhi26 | 7.891  | 7.609  | 8.581  | 8.274  | 6.846  | 7.210  | 7.589 | 8.505  | 9.143 | 8.572  | 6.493 | 6.837 | 5.948 | 6.436 |

Table S2: Allelic richness per locus per population, as defined by Structure. Calculations were based on 28 diploid individuals.

|       | NR     | OI     | CR     | SER    | SL    |
|-------|--------|--------|--------|--------|-------|
| Mhi1  | 13.997 | 16.146 | 10.803 | 8.567  | 1.996 |
| Mhi2  | 16.618 | 18.766 | 16.481 | 10.975 | 6.005 |
| Mhi14 | 9.536  | 8.864  | 8.405  | 4.752  | 4.406 |
| Mhi16 | 2.906  | 4.252  | 6.176  | 2.000  | 5.087 |
| Mhi17 | 5.462  | 3.692  | 4.450  | 1.000  | 2.000 |
| Mhi18 | 13.895 | 20.350 | 15.410 | 11.035 | 8.020 |
| Mhi20 | 18.040 | 13.344 | 17.358 | 12.286 | 5.576 |
| Mhi21 | 10.712 | 17.660 | 10.637 | 7.727  | 5.860 |
| Mhi23 | 9.000  | 11.827 | 14.730 | 5.848  | 4.159 |
| Mhi26 | 12.918 | 13.644 | 11.340 | 7.948  | 7.688 |

Table S3: Characterization of the ten microsatellite *loci* used in *Mussismilia hispida* for each site sampled. The number of alleles (A), observed heterozygosity (Ho), expected heterozygosity (He) and  $F_{IS}$  calculated for each locus for each location ( $F_{IS}$ ) are given. Bold numbers of  $F_{IS}$  indicate adjusted significant values ( $p < 0.0003$ ). Sampling sites are abbreviated as in Table 1.

|                | PML          | FZ           | AR           | FN           | JP           | TE           | SA           | PS           | AB           | GP           | TR           | BZ           | AC           | IB           | IG           |
|----------------|--------------|--------------|--------------|--------------|--------------|--------------|--------------|--------------|--------------|--------------|--------------|--------------|--------------|--------------|--------------|
| <b>Mhi1</b>    |              |              |              |              |              |              |              |              |              |              |              |              |              |              |              |
| A              | 8            | 12           | 13           | 16           | 10           | 8            | 8            | 11           | 13           | 6            | 15           | 7            | 9            | 2            | 2            |
| Ho             | 0.714        | 0.793        | 0.579        | 0.650        | 0.688        | 0.353        | 0.571        | 0.485        | 0.485        | 0.750        | 0.720        | 0.346        | 0.613        | 0.128        | 0.059        |
| He             | 0.901        | 0.886        | 0.898        | 0.859        | 0.843        | 0.733        | 0.648        | 0.584        | 0.748        | 0.710        | 0.895        | 0.603        | 0.770        | 0.166        | 0.112        |
| $F_{IS}$       | 0.221        | 0.106        | <b>0.361</b> | <b>0.246</b> | 0.189        | <b>0.526</b> | 0.121        | 0.172        | <b>0.355</b> | -0.059       | 0.199        | 0.430        | 0.207        | 0.228        | 0.480        |
| <b>Mhi2</b>    |              |              |              |              |              |              |              |              |              |              |              |              |              |              |              |
| A              | 9            | 14           | 14           | 21           | 15           | 10           | 12           | 15           | 17           | 9            | 17           | 10           | 11           | 7            | 6            |
| Ho             | 0.714        | 0.759        | 0.684        | 0.795        | 0.875        | 0.824        | 0.727        | 0.727        | 0.882        | 0.700        | 0.654        | 0.792        | 0.806        | 0.526        | 0.545        |
| He             | 0.879        | 0.858        | 0.892        | 0.895        | 0.940        | 0.863        | 0.901        | 0.892        | 0.897        | 0.889        | 0.865        | 0.854        | 0.887        | 0.609        | 0.660        |
| $F_{IS}$       | 0.200        | 0.117        | 0.238        | 0.114        | 0.071        | 0.047        | 0.196        | 0.187        | 0.016        | 0.222        | 0.248        | 0.074        | 0.092        | 0.138        | 0.176        |
| <b>Mhi14</b>   |              |              |              |              |              |              |              |              |              |              |              |              |              |              |              |
| A              | 5            | 10           | 6            | 9            | 6            | 8            | 8            | 8            | 7            | 5            | 11           | 5            | 4            | 3            | 6            |
| Ho             | 0.429        | 0.966        | 0.895        | 0.875        | 0.533        | 0.588        | 0.818        | 0.727        | 0.471        | 0.583        | 0.767        | 0.600        | 0.258        | 0.500        | 0.471        |
| He             | 0.725        | 0.860        | 0.795        | 0.782        | 0.722        | 0.766        | 0.800        | 0.752        | 0.712        | 0.743        | 0.822        | 0.744        | 0.694        | 0.670        | 0.665        |
| $F_{IS}$       | 0.429        | -0.126       | -0.129       | -0.120       | 0.268        | 0.238        | -0.023       | 0.033        | 0.342        | 0.222        | 0.068        | 0.196        | <b>0.632</b> | 0.256        | 0.296        |
| <b>Mhi16</b>   |              |              |              |              |              |              |              |              |              |              |              |              |              |              |              |
| A              | 2            | 2            | 3            | 6            | 6            | 3            | 6            | 4            | 6            | 2            | 3            | 2            | 2            | 6            | 4            |
| Ho             | 0.000        | 0.069        | 0.105        | 0.200        | 0.313        | 0.059        | 0.318        | 0.121        | 0.176        | 0.182        | 0.111        | 0.077        | 0.161        | 0.538        | 0.235        |
| He             | 0.264        | 0.068        | 0.198        | 0.190        | 0.389        | 0.169        | 0.737        | 0.118        | 0.221        | 0.173        | 0.108        | 0.145        | 0.204        | 0.446        | 0.218        |
| $F_{IS}$       | 1.000        | -0.018       | 0.474        | -0.054       | 0.202        | 0.660        | <b>0.574</b> | -0.028       | 0.205        | -0.053       | -0.026       | 0.474        | 0.211        | -0.210       | -0.080       |
| <b>Mhi17</b>   |              |              |              |              |              |              |              |              |              |              |              |              |              |              |              |
| A              | 3            | 5            | 2            | 4            | 2            | 4            | 5            | 4            | 4            | 4            | 5            | 1            | 1            | 2            | 2            |
| Ho             | 0.143        | 0.414        | 0.526        | 0.425        | 0.250        | 0.529        | 0.591        | 0.455        | 0.324        | 0.167        | 0.100        | 0.000        | 0.000        | 0.385        | 0.324        |
| He             | 0.385        | 0.405        | 0.501        | 0.428        | 0.226        | 0.512        | 0.689        | 0.443        | 0.377        | 0.431        | 0.462        | 0.000        | 0.000        | 0.315        | 0.275        |
| $F_{IS}$       | 0.647        | -0.023       | -0.053       | 0.008        | -0.111       | -0.036       | 0.146        | -0.026       | 0.143        | 0.624        | <b>0.786</b> | NA           | NA           | -0.226       | -0.179       |
| <b>Mhi18</b>   |              |              |              |              |              |              |              |              |              |              |              |              |              |              |              |
| A              | 6            | 15           | 14           | 19           | 10           | 12           | 12           | 17           | 13           | 11           | 22           | 12           | 9            | 12           | 6            |
| Ho             | 0.429        | 0.724        | 0.526        | 0.316        | 0.438        | 0.563        | 0.682        | 0.758        | 0.647        | 0.750        | 0.733        | 0.846        | 0.774        | 0.846        | 0.853        |
| He             | 0.681        | 0.776        | 0.747        | 0.741        | 0.786        | 0.895        | 0.828        | 0.827        | 0.701        | 0.848        | 0.804        | 0.849        | 0.802        | 0.792        | 0.773        |
| $F_{IS}$       | 0.390        | 0.067        | 0.301        | 0.577        | <b>0.452</b> | 0.379        | 0.180        | 0.085        | 0.079        | 0.120        | 0.089        | 0.004        | 0.035        | -0.069       | -0.106       |
| <b>Mhi20</b>   |              |              |              |              |              |              |              |              |              |              |              |              |              |              |              |
| A              | 9            | 18           | 8            | 10           | 12           | 12           | 17           | 15           | 17           | 10           | 16           | 10           | 13           | 4            | 6            |
| Ho             | 0.857        | 0.846        | 0.737        | 0.625        | 0.875        | 0.706        | 0.762        | 0.813        | 0.735        | 0.750        | 0.643        | 0.654        | 0.733        | 0.205        | 0.529        |
| He             | 0.934        | 0.912        | 0.691        | 0.669        | 0.905        | 0.913        | 0.919        | 0.843        | 0.889        | 0.899        | 0.875        | 0.771        | 0.827        | 0.193        | 0.582        |
| $F_{IS}$       | 0.089        | 0.073        | -0.068       | 0.067        | 0.034        | 0.232        | 0.174        | 0.036        | 0.175        | 0.172        | <b>0.269</b> | 0.154        | 0.115        | -0.063       | 0.092        |
| <b>Mhi21</b>   |              |              |              |              |              |              |              |              |              |              |              |              |              |              |              |
| A              | 5            | 10           | 14           | 21           | 10           | 11           | 7            | 10           | 10           | 8            | 11           | 8            | 7            | 5            | 6            |
| Ho             | 0.286        | 0.414        | 0.563        | 0.632        | 0.563        | 0.500        | 0.400        | 0.452        | 0.500        | 0.667        | 0.793        | 0.542        | 0.552        | 0.242        | 0.294        |
| He             | 0.813        | 0.855        | 0.879        | 0.895        | 0.784        | 0.847        | 0.815        | 0.837        | 0.837        | 0.880        | 0.819        | 0.680        | 0.686        | 0.369        | 0.424        |
| $F_{IS}$       | <b>0.667</b> | <b>0.521</b> | 0.368        | <b>0.297</b> | 0.289        | <b>0.417</b> | <b>0.516</b> | <b>0.464</b> | <b>0.406</b> | 0.251        | 0.032        | 0.207        | 0.199        | 0.346        | 0.310        |
| <b>Mhi23</b>   |              |              |              |              |              |              |              |              |              |              |              |              |              |              |              |
| A              | 4            | 8            | 8            | 12           | 7            | 10           | 14           | 15           | 18           | 4            | 10           | 5            | 7            | 4            | 4            |
| Ho             | 1.000        | 0.958        | 0.867        | 0.765        | 0.250        | 0.563        | 0.773        | 0.636        | 0.618        | 0.500        | 0.800        | 0.458        | 0.484        | 0.256        | 0.324        |
| He             | 0.786        | 0.732        | 0.805        | 0.817        | 0.817        | 0.845        | 0.872        | 0.896        | 0.921        | 0.685        | 0.799        | 0.700        | 0.714        | 0.543        | 0.545        |
| $F_{IS}$       | -0.333       | -0.318       | -0.080       | 0.064        | <b>0.701</b> | 0.341        | 0.116        | <b>0.293</b> | <b>0.333</b> | 0.279        | -0.002       | 0.350        | 0.326        | <b>0.531</b> | 0.410        |
| <b>Mhi26</b>   |              |              |              |              |              |              |              |              |              |              |              |              |              |              |              |
| A              | 9            | 12           | 22           | 15           | 10           | 8            | 9            | 11           | 13           | 10           | 14           | 7            | 9            | 8            | 9            |
| Ho             | 1.000        | 0.828        | 0.684        | 0.838        | 0.688        | 0.923        | 0.591        | 0.781        | 0.848        | 0.833        | 0.633        | 0.577        | 0.677        | 0.744        | 0.794        |
| He             | 0.939        | 0.856        | 0.708        | 0.835        | 0.867        | 0.797        | 0.835        | 0.852        | 0.839        | 0.891        | 0.821        | 0.817        | 0.844        | 0.795        | 0.811        |
| $F_{IS}$       | -0.071       | 0.034        | 0.035        | -0.003       | 0.212        | -0.166       | 0.297        | 0.084        | -0.012       | 0.068        | 0.232        | 0.298        | 0.200        | 0.065        | 0.021        |
| <b>Overall</b> |              |              |              |              |              |              |              |              |              |              |              |              |              |              |              |
| Ho             | 0.557        | 0.677        | 0.617        | 0.612        | 0.547        | 0.561        | 0.623        | 0.595        | 0.569        | 0.588        | 0.595        | 0.489        | 0.506        | 0.437        | 0.443        |
| He             | 0.731        | 0.721        | 0.711        | 0.711        | 0.728        | 0.734        | 0.804        | 0.704        | 0.714        | 0.715        | 0.727        | 0.616        | 0.643        | 0.490        | 0.507        |
| $F_{IS}$       | <b>0.250</b> | 0.062        | 0.137        | <b>0.141</b> | <b>0.255</b> | <b>0.242</b> | <b>0.229</b> | <b>0.157</b> | <b>0.206</b> | <b>0.184</b> | <b>0.184</b> | <b>0.209</b> | <b>0.216</b> | 0.109        | <b>0.128</b> |

Table S4: Characterization of the ten microsatellite *loci* used in *Mussismilia hispida* for each population as defined by Structure. The number of alleles (A), observed heterozygosity (Ho), expected heterozygosity (He) and  $F_{IS}$  calculated for each locus for each population ( $F_{IS}$ ) are given. Bold numbers of  $F_{IS}$  indicate adjusted significant values ( $p < 0.001$ ).

|         |          | Northern<br>Region | Oceanic<br>Islands | Central<br>Region | Southeastern<br>Region | Southern<br>Limit |
|---------|----------|--------------------|--------------------|-------------------|------------------------|-------------------|
| Mhi1    | A        | 15                 | 22                 | 20                | 10                     | 2                 |
|         | Ho       | 0.778              | 0.655              | 0.530             | 0.491                  | 0.096             |
|         | He       | 0.888              | 0.893              | 0.703             | 0.717                  | 0.140             |
|         | $F_{IS}$ | 0.022              | <b>0.001</b>       | <b>0.001</b>      | <b>0.001</b>           | 0.047             |
| Mhi2    | N        |                    |                    |                   |                        |                   |
|         | A        | 19                 | 30                 | 29                | 12                     | 7                 |
|         | Ho       | 0.750              | 0.726              | 0.795             | 0.800                  | 0.535             |
|         | He       | 0.879              | 0.909              | 0.908             | 0.872                  | 0.633             |
|         | $F_{IS}$ | 0.021              | <b>0.001</b>       | <b>0.001</b>      | 0.096                  | 0.024             |
| Mhi14   | A        | 10                 | 11                 | 10                | 5                      | 6                 |
|         | Ho       | 0.861              | 0.843              | 0.624             | 0.411                  | 0.486             |
|         | He       | 0.853              | 0.817              | 0.755             | 0.711                  | 0.669             |
|         | $F_{IS}$ | 0.642              | 0.803              | <b>0.001</b>      | <b>0.001</b>           | <b>0.001</b>      |
| Mhi16   | A        | 3                  | 7                  | 7                 | 2                      | 6                 |
|         | Ho       | 0.056              | 0.151              | 0.188             | 0.123                  | 0.397             |
|         | He       | 0.108              | 0.166              | 0.345             | 0.176                  | 0.349             |
|         | $F_{IS}$ | 0.022              | 0.201              | <b>0.001</b>      | 0.078                  | 1.000             |
| Mhi17   | A        | 6                  | 6                  | 2                 | 1                      | 2                 |
|         | Ho       | 0.361              | 0.337              | 0.403             | 0.000                  | 0.356             |
|         | He       | 0.397              | 0.458              | 0.461             | 0.000                  | 0.295             |
|         | $F_{IS}$ | 0.300              | 0.004              | 0.030             |                        | 1.000             |
| Mhi18_d | A        | 16                 | 39                 | 30                | 14                     | 12                |
|         | Ho       | 0.667              | 0.506              | 0.654             | 0.807                  | 0.849             |
|         | He       | 0.763              | 0.764              | 0.817             | 0.821                  | 0.781             |
|         | $F_{IS}$ | 0.082              | <b>0.001</b>       | <b>0.001</b>      | 0.448                  | 0.953             |
| Mhi20   | A        | 19                 | 19                 | 27                | 16                     | 7                 |
|         | Ho       | 0.848              | 0.655              | 0.773             | 0.696                  | 0.356             |
|         | He       | 0.925              | 0.764              | 0.894             | 0.802                  | 0.400             |
|         | $F_{IS}$ | 0.077              | 0.005              | <b>0.001</b>      | 0.019                  | 0.104             |
| Mhi21   | A        | 11                 | 27                 | 16                | 9                      | 8                 |
|         | Ho       | 0.389              | 0.675              | 0.496             | 0.547                  | 0.269             |
|         | He       | 0.852              | 0.893              | 0.847             | 0.685                  | 0.398             |
|         | $F_{IS}$ | <b>0.001</b>       | <b>0.001</b>       | <b>0.001</b>      | 0.012                  | <b>0.001</b>      |
| Mhi23   | A        | 9                  | 13                 | 19                | 7                      | 5                 |
|         | Ho       | 0.964              | 0.797              | 0.586             | 0.473                  | 0.288             |
|         | He       | 0.734              | 0.803              | 0.872             | 0.707                  | 0.551             |
|         | $F_{IS}$ | 1.000              | 0.504              | <b>0.001</b>      | <b>0.001</b>           | <b>0.001</b>      |
| Mhi26   | A        | 14                 | 17                 | 17                | 9                      | 9                 |
|         | Ho       | 0.857              | 0.733              | 0.773             | 0.632                  | 0.767             |
|         | He       | 0.874              | 0.812              | 0.847             | 0.833                  | 0.802             |
|         | $F_{IS}$ | 0.474              | 0.019              | 0.011             | <b>0.001</b>           | 0.263             |
| Overall | Ho       | 0.653              | 0.608              | 0.582             | 0.498                  | 0.440             |
|         | He       | 0.727              | 0.728              | 0.745             | 0.632                  | 0.502             |
|         | $F_{IS}$ | <b>0.103</b>       | <b>0.166</b>       | <b>0.219</b>      | <b>0.214</b>           | <b>0.124</b>      |

Table S5: Values of the mutation-scaled effective population size ( $\Theta$ ) and the number of migrants per generation (Nem) of *Mussismilia hispida* for all six migration scenarios tested on Migrate, where NR: Northern Region, OI: Oceanic Islands, CR: Central Region, SER: Southeastern Region and SL: Southern Limit.

|                | Scenario 1 | Scenario 2 | Scenario 3 | Scenario 4 | Scenario 5 | Scenario 6 |
|----------------|------------|------------|------------|------------|------------|------------|
| $\Theta_{NR}$  | 0.263      | 0.038      | 0.008      | 0.008      | 0.008      | 0.143      |
| $\Theta_{OI}$  | 0.473      | 1.463      | 1.088      | 0.803      | 1.358      | 0.008      |
| $\Theta_{CR}$  | 1.493      | 0.008      | 1.988      | 1.178      | 0.383      | 0.008      |
| $\Theta_{SER}$ | 0.263      | 0.053      | 0.188      | 0.308      | 0.008      | 0.248      |
| $\Theta_{SL}$  | 0.233      | 0.143      | 0.008      | 0.218      | 0.473      | 0.233      |
| Nem NR>OI      | 5.95       | -          | -          | 4.65       | -          | -          |
| Nem NR>CR      | 5.67       | -          | -          | -          | -          | -          |
| Nem NR>SER     | 5.09       | -          | -          | -          | -          | -          |
| Nem NR>SL      | 1.91       | -          | -          | -          | -          | -          |
| Nem OI>NR      | 5.62       | 0.16       | 0.06       | 0.09       | 0.04       | 1.17       |
| Nem OI>CR      | 25.97      | -          | 12.32      | 7.30       | 2.07       | 0.06       |
| Nem OI>SER     | 4.25       | -          | -          | -          | -          | -          |
| Nem OI>SL      | 3.30       | -          | -          | -          | -          | -          |
| Nem CR>NR      | 3.62       | -          | -          | -          | -          | -          |
| Nem CR>OI      | 11.25      | 2.63       | 7.61       | 3.05       | 3.53       | 0.03       |
| Nem CR>SER     | 7.72       | 0.24       | 0.49       | 1.78       | 0.02       | 1.34       |
| Nem CR>SL      | 7.11       | 0.26       | -          | -          | -          | -          |
| Nem SER>NR     | 4.88       | -          | -          | -          | -          | -          |
| Nem SER>OI     | 5.20       | -          | -          | -          | -          | -          |
| Nem SER>CR     | 18.81      | -          | -          | 4.95       | -          | 0.03       |
| Nem SER>SL     | 7.86       | 2.14       | 0.10       | 4.48       | 6.14       | -          |
| Nem SL>NR      | 1.94       | -          | -          | -          | -          | -          |
| Nem SL>OI      | 8.03       | -          | -          | -          | -          | -          |
| Nem SL>CR      | 27.16      | -          | -          | -          | -          | -          |
| Nem SL>SER     | 6.67       | 0.58       | -          | 15.19      | -          | -          |

Figure S1: Values of LnPD (A) and Delta K (B) for the  $K$  values tested in the Structure analysis, ranging from 1 to 15. The best value of  $K$  was defined using the higher likelihood mean (LnPD), as suggested by Waples and Gaggiotti (2006).

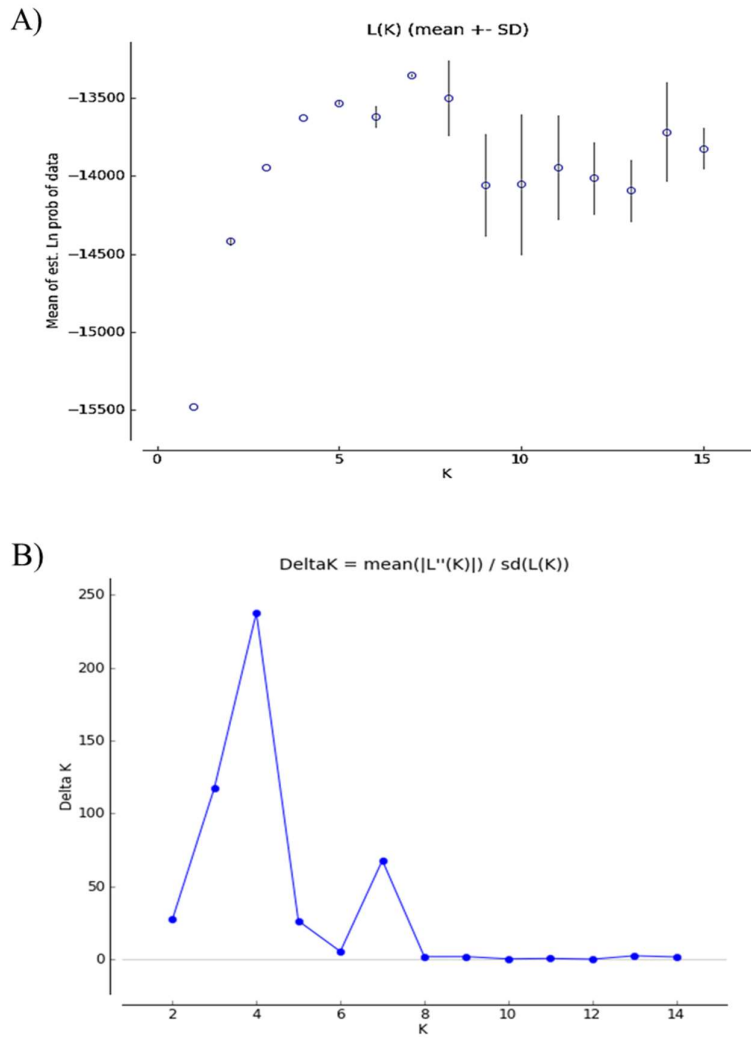

Figure S2: Bar plot showing the average probability of membership of each sample (vertical bars) in each population (colors) for  $K=1$  to  $K=7$  of *Mussismilia hispida*. Analyses were made with 10 iterations and with sampling locations as prior. Sampling sites are in the y-axis separated by vertical black lines, abbreviated as in Table 1.

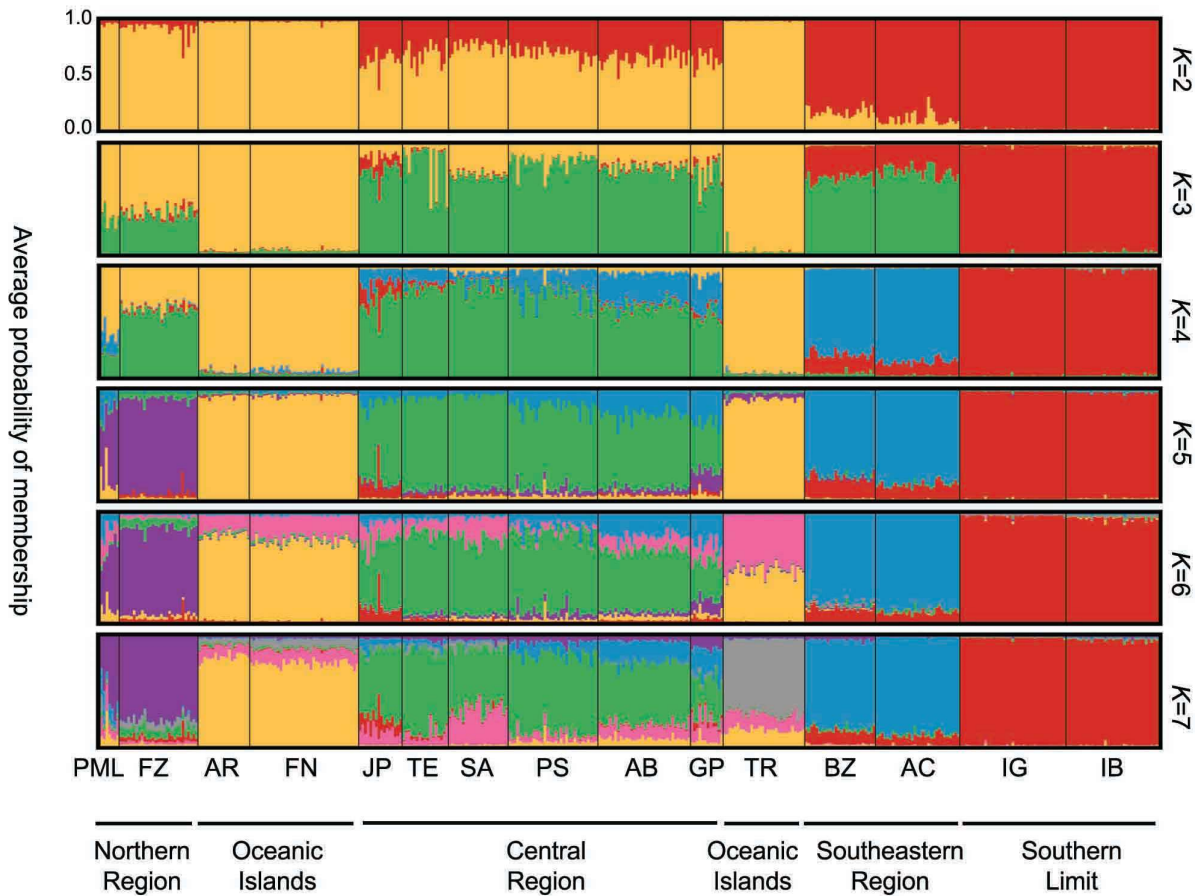

Figure S3: Bar plot showing the average probability of membership of each sample (vertical bars) in each population (colors) for  $K=2$  of *Mussismilia hispida* individuals from Oceanic Islands' sites. Analyses were made with 10 iterations and without sampling locations as prior. Sampling sites are in the y-axis separated by vertical black lines, abbreviated as in Table 1.

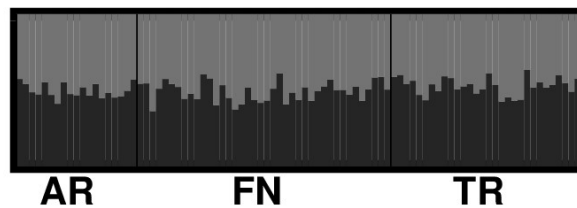

Supplement: 41598_2018_21010_MOESM1_ESM.pdf [file 41598_2018_21010_MOESM1_ESM.pdf]
